# Supplementary material
Source: PubMed Central journal article supplement (PMC7936378)
Supplement: pnas.2024855118.sapp.pdf [file pnas.2024855118.sapp.pdf]

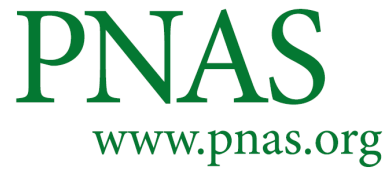

Supplementary Information

**Continuous Electrochemical Water Splitting from Natural Water  
Sources via Forward Osmosis**

Samuel S. Veroneau and Daniel G. Nocera\*

Department of Chemistry and Chemical Biology, Harvard University, 12 Oxford Street, Cambridge, MA  
02138

\* Corresponding author email: [dnocera@fas.harvard.edu](mailto:dnocera@fas.harvard.edu)

## Table of Contents

|                                                                                                       |   |
|-------------------------------------------------------------------------------------------------------|---|
| A. Literature Search.....                                                                             | 3 |
| B. Analytical Methods.....                                                                            | 3 |
| B.1 Phosphate concentration determination.....                                                        | 3 |
| <b>Figure S1.</b> Malachite absorption assay and concentration standard plot.....                     | 3 |
| B.2 Chloride concentration determination.....                                                         | 3 |
| <b>Figure S2.</b> Lucigenin fluorescence assay and concentration standard plot.....                   | 4 |
| B.1 HClO <sup>-</sup> /ClO <sup>-</sup> concentration determination.....                              | 4 |
| <b>Figure S3.</b> DPD absorption assay and concentration standard plot.....                           | 4 |
| C. Experimental Set-up of FOWS Cell.....                                                              | 5 |
| <b>Figure S4.</b> Image of FOWS cell.....                                                             | 5 |
| D. Faradaic Efficiency for Direct Saltwater Splitting.....                                            | 5 |
| <b>Figure S5.</b> Faradaic efficiency over 24 h for H <sub>2</sub> and O <sub>2</sub> generation..... | 5 |

## A. Literature Review

An exhaustive literature review was performed using Google Scholar and Web of Science, among other databases. Keywords for searches included osmosis, forward osmosis, electrolysis, water-splitting, and seawater; queries were searched with permutations of these words and others. Additionally, a third-party performed a review of the patent literature at our request. To our knowledge based on these literature and patent searches, the approach described herein has not previously been reported.

## B. Analytical Methods

### B.1 Phosphate Concentration Determination

Absorption spectra of a Malachite green assay were measured and compared to a seven-point standard curve (Fig. S1) to furnish phosphate concentration in the outer electrolyte solution. An aliquot of samples taken from the outer electrolyte solution were diluted 200-fold for these measurements.

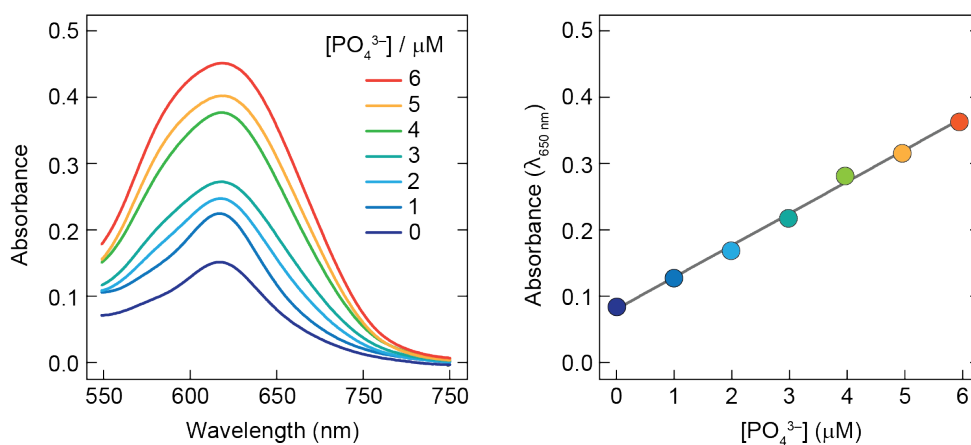

**Figure S1.** Absorption spectra (left) and standard curve fitting (right) for Malachite green phosphate assay (maximum absorption at  $\lambda = 621$  nm) at the following  $[\text{PO}_4^{3-}]$ : 0  $\mu\text{M}$ , 1  $\mu\text{M}$ , 2  $\mu\text{M}$ , 3  $\mu\text{M}$ , 4  $\mu\text{M}$ , 5  $\mu\text{M}$ , and 6  $\mu\text{M}$ . Additionally, these standard samples contained 3 mM NaCl to correspond with experimental samples and dilution.

### B.2 Chloride Concentration Determination

Fluorescence emission spectra of a Lucigenin assay were measured and compared to a seven-point standard curve (Fig. S2) to furnish  $\text{Cl}^-$  concentrations. An aliquot of samples taken from the inner electrolyte solution were diluted 16-fold for these measurements.

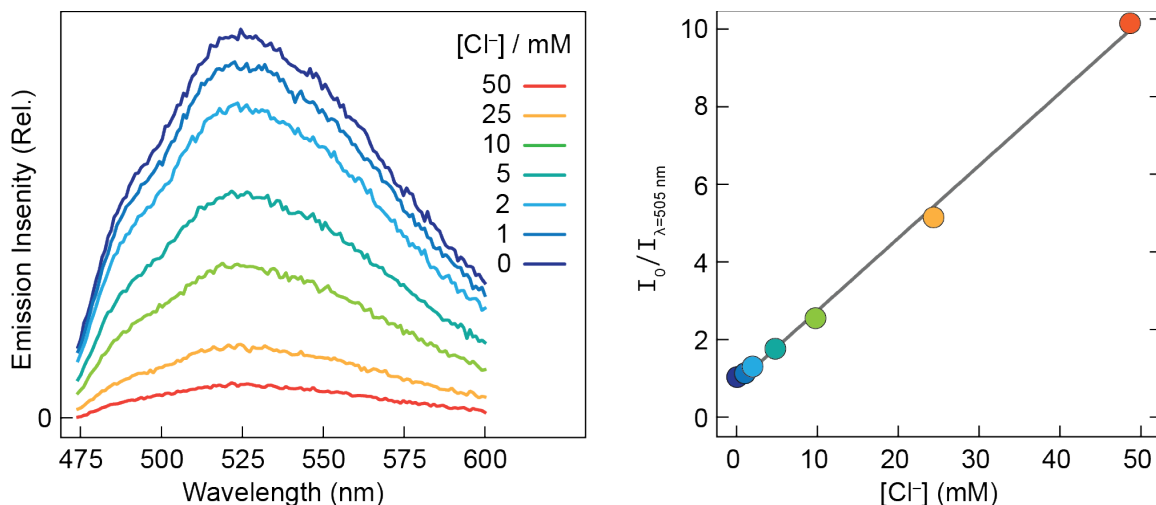

**Figure S2.** Emission spectra (left) and standard curve fitting (right) for Lucigenin assay ( $\lambda_{\text{exc}} = 455 \text{ nm}$ ) at the following [Cl<sup>-</sup>]: 0 mM, 1 mM, 2 mM, 5 mM, 10 mM, 25 mM, and 50 mM. Additionally, these standard samples contained 50 mM NaP<sub>i</sub> to correspond with experimental samples and dilution

### B.3 HClO/ClO<sup>-</sup> Concentration Determination

Absorption spectra of a DPD assay were measured and compared to a seven-point standard curve (Fig. S3) to furnish the total HClO/ClO<sup>-</sup> concentration in the inner electrolyte solution. An aliquot of samples taken from the inner electrolyte solution were diluted 16-fold for these measurements.

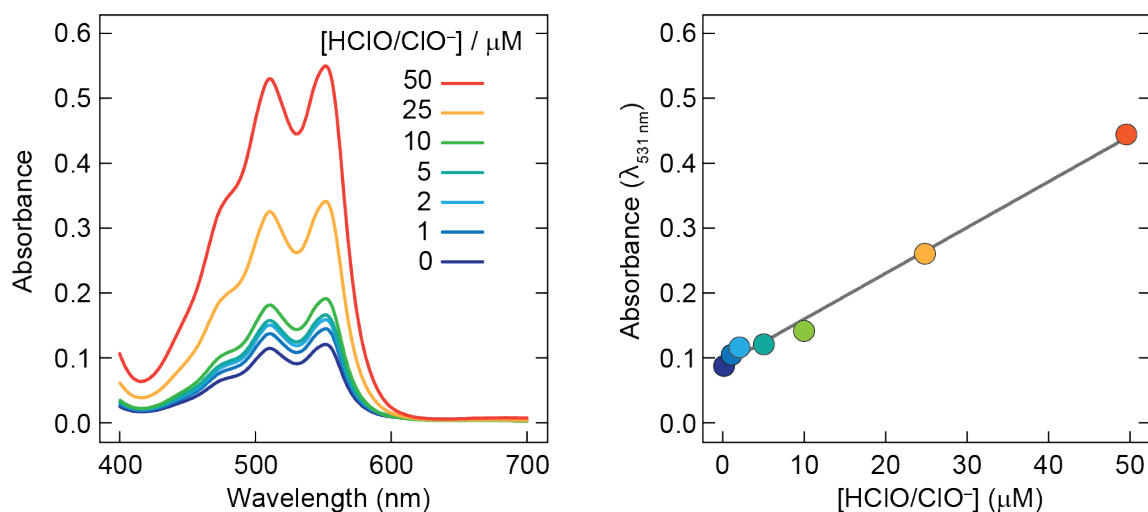

**Figure S3.** Absorption spectra (left) and standard curve fitting (right) for DPD assay (maximum absorption at  $\lambda_{\text{max,abs}} = 531 \text{ nm}$ ) at the following [HClO/ClO<sup>-</sup>]: 0 μM, 1 μM, 2 mM, 5 μM, 10 μM, 25 μM, and 50 μM. Additionally, these standard samples contained 50 mM NaP<sub>i</sub> to correspond with experimental samples and dilution.

## C. Experimental Set-up

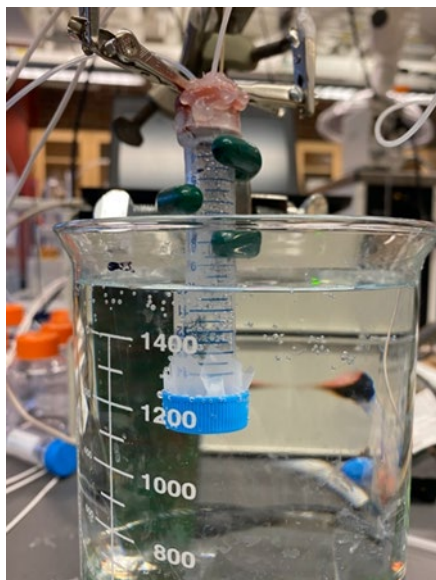

**Figure S4.** Image of FOWS cell in outer electrolyte of 0.6 M NaCl.

## D. Faradaic Efficiency for Direct Saltwater Splitting

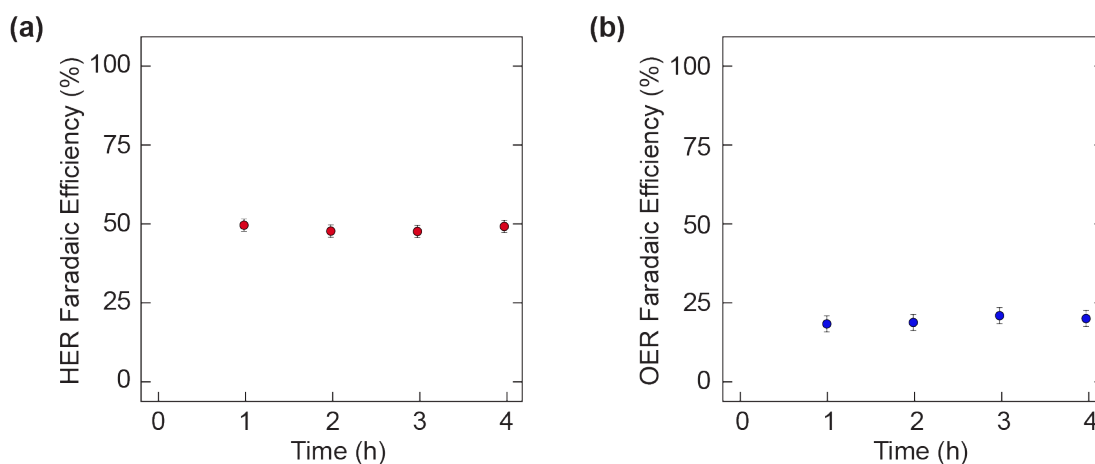

**Figure S5.** Faradaic efficiency plots for (a) O<sub>2</sub> and (b) H<sub>2</sub> generation from water-splitting directly from 0.6 M NaCl. Electrochemical experiments were conducted on a CH Instruments 760D bipotentiostat, using Pt flag electrodes for the anode and cathode in a single-compartment electrochemical cell operated at 250 mA.
